# Supplementary material
Source: HighWire-hosted journal article supplement (https://tech.snmjournals.org/highwire/filestream/9942/field_highwire_adjunct_files/0/262462_Supplemental_Data.pdf)

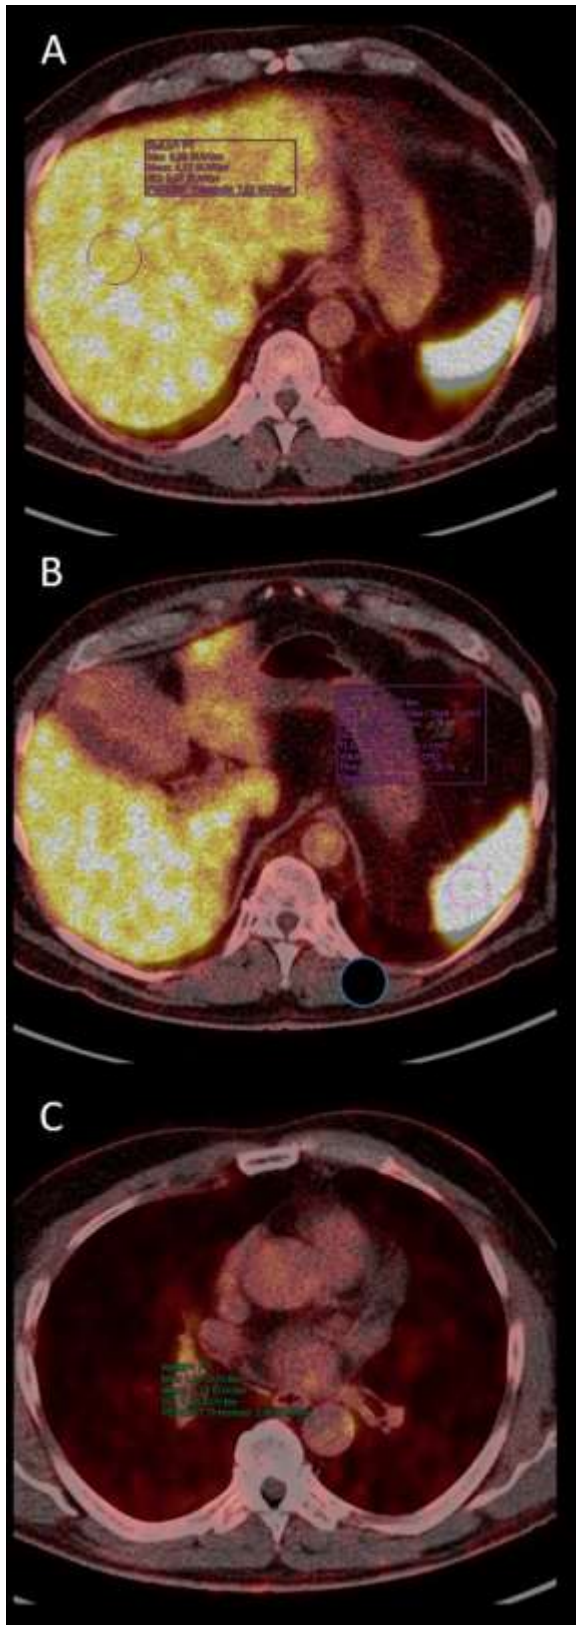

Color version of Figure 2.

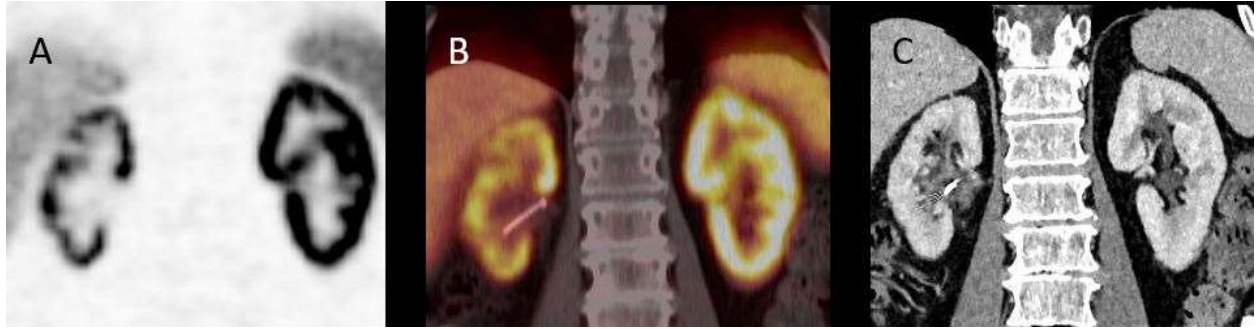

Color version of Figure 4.

Supplement: 262462_Supplemental_Data.pdf [file 262462_Supplemental_Data.pdf]
